# Supplementary material
Source: ML conference proceedings conference paper supplement (https://openreview.net/forum?id=5MgZAu2NR7X)
Supplement: supplementary_material [file attachment]

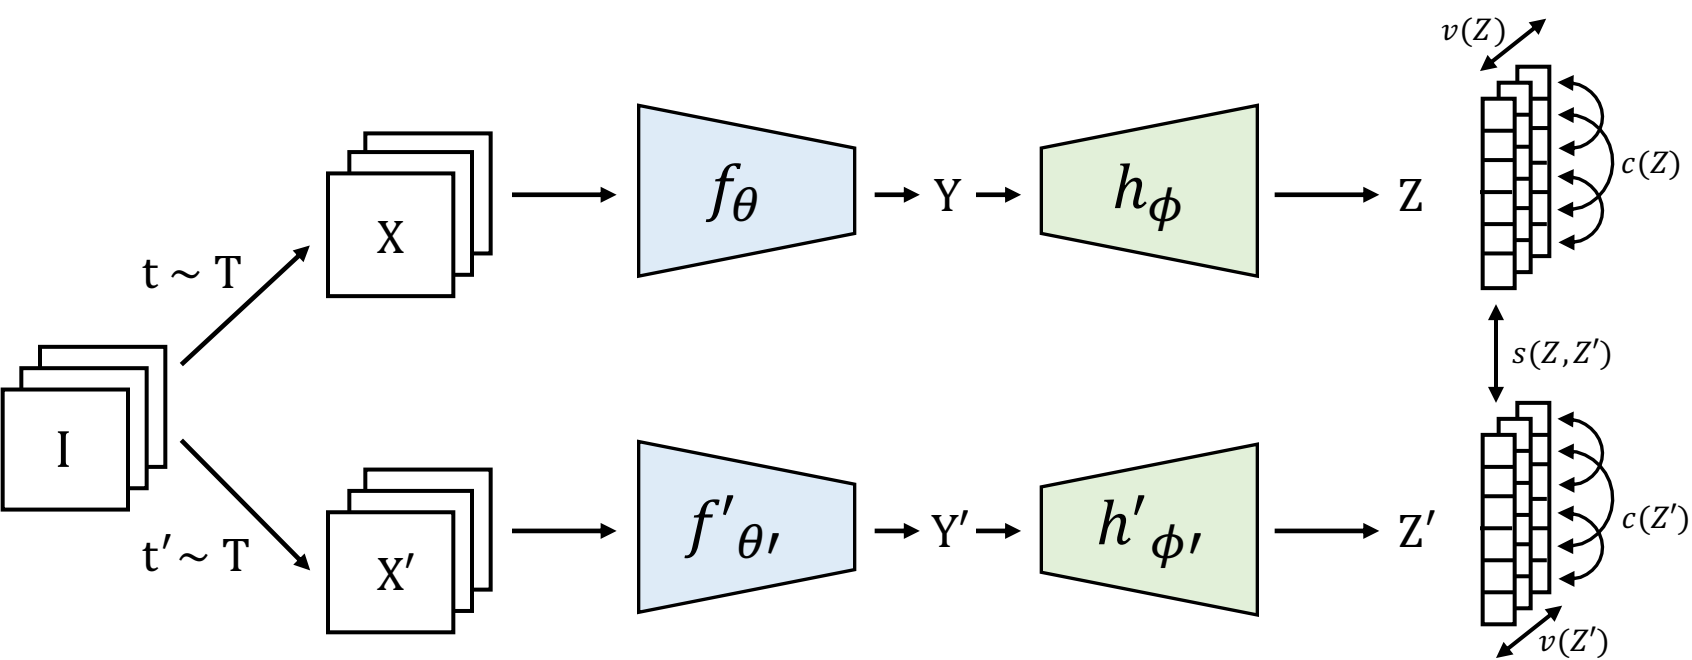

$v$  : maintain variance

$c$  : bring covariance to zero

$s$  : minimize distance

$T$  : distribution of transformations

$t, t'$  : random transformations

$f_\theta, f'_{\theta'}$  : encoders

$h_\phi, h'_{\phi'}$  : expanders

$I$  : batch of images

$X, X'$  : batches of views

$Y, Y'$  : batches of representations

$Z, Z'$  : batches of embeddings
